# Supplementary material
Source: Research Square preprint supplement (doi:10.21203/rs.3.rs-9271375/v1)
Supplement: Supplementary file 1 [file 7d0fc87ae959c807665e11bb.pdf]

# Supplementary Information for A Solution-Gated Graphene FET Receiver for Molecular Communications with Low-Frequency PSD and Derivative-Based Detection

## 1 CAD-Based design of the MC Receiver

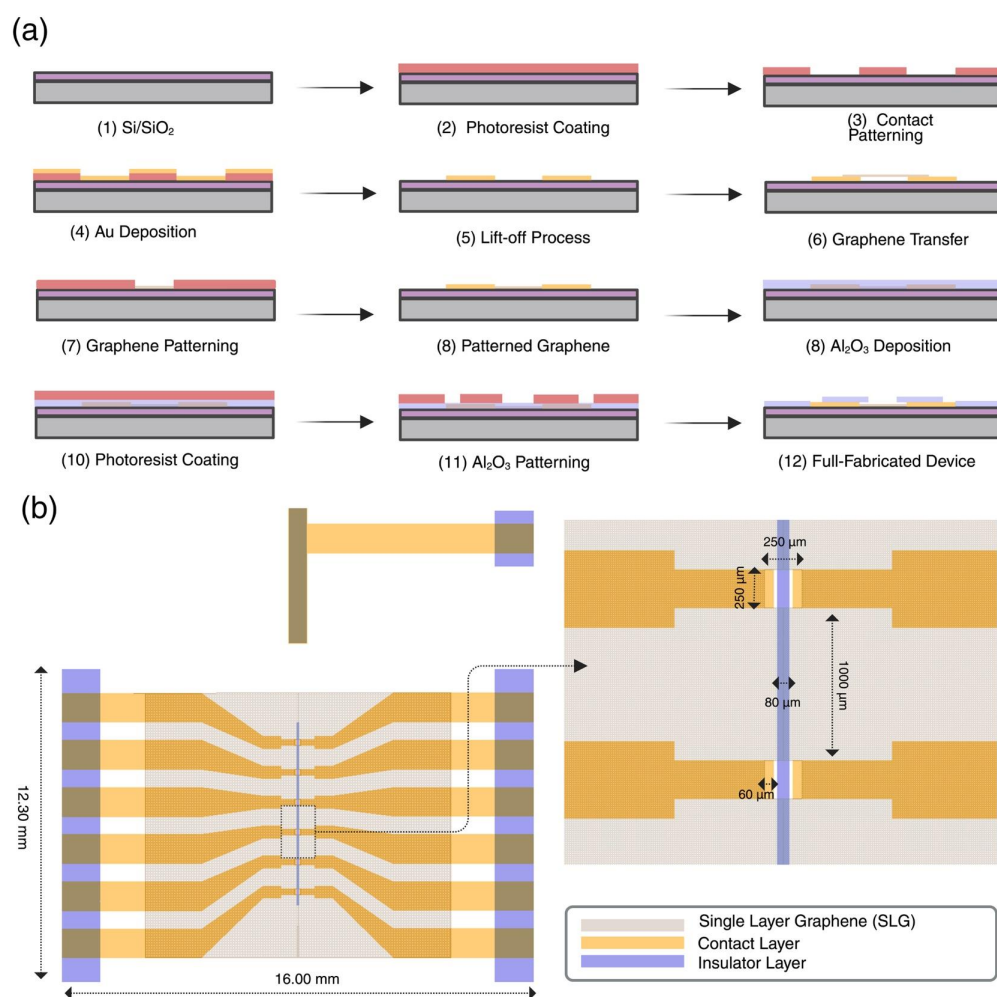

**Figure S1. GFET fabrication process and device layout.** (a) Process flow for the solution-gated GFET receiver. The fabrication sequence illustrates the patterning of Au electrodes on a Si/SiO<sub>2</sub> substrate, transfer and patterning of CVD graphene, and Al<sub>2</sub>O<sub>3</sub> passivation with subsequent etching to define the active sensing window. (b) Device layout schematics illustrating the overall chip, the GFET sensing area, and the layered composition, with key dimensions indicated.

## 2 Characterization of the MC Receiver

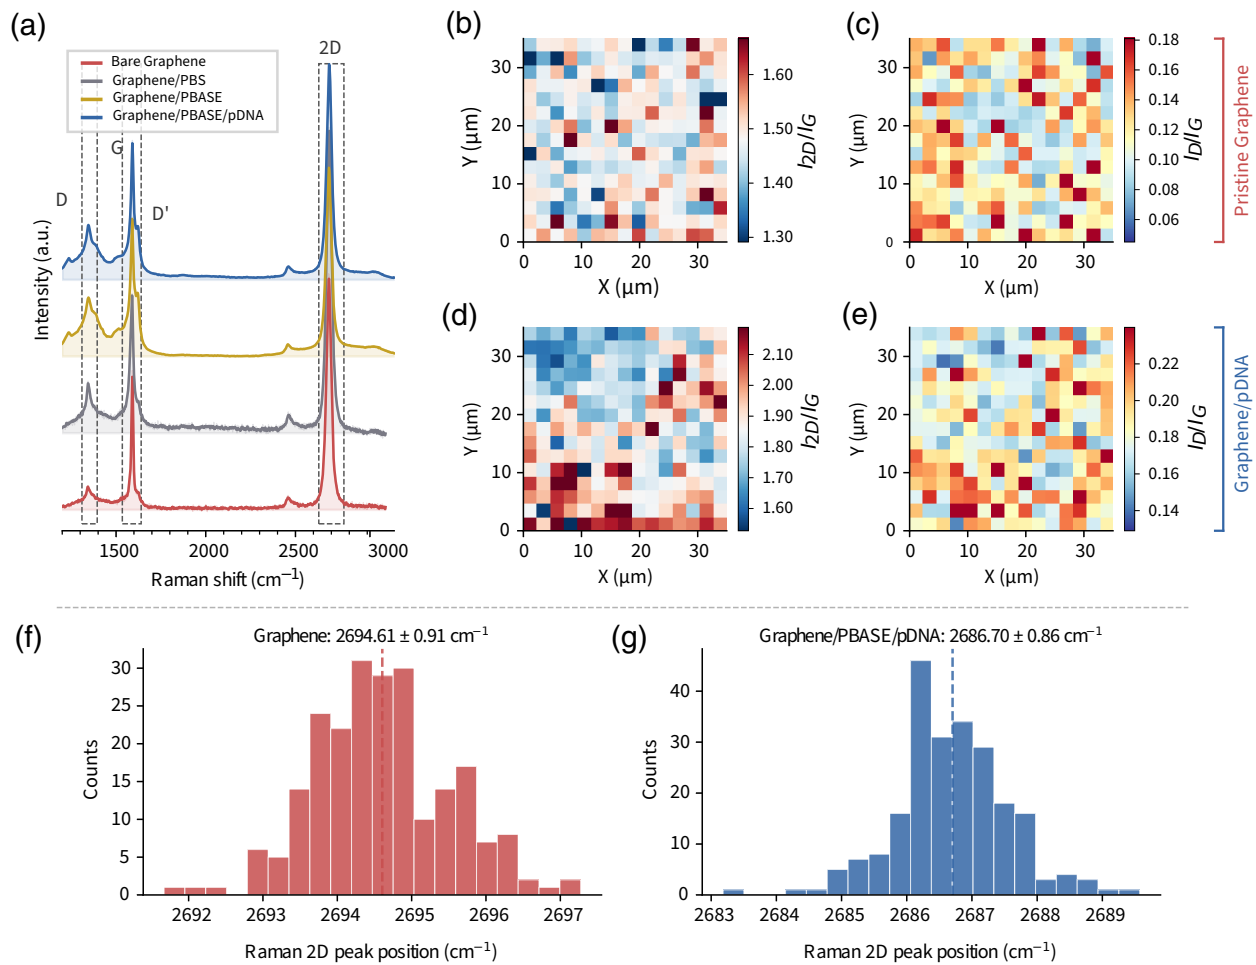

**Figure S2. Raman spectroscopy analysis of the graphene surface during biofunctionalization.** (a) Averaged Raman spectra collected at successive stages: pristine graphene, after PBS exposure, PBASE modification, and probe DNA (pDNA) immobilization. (b, c) Histograms comparing the 2D peak positions of (b) pristine graphene and (c) pDNA-functionalized graphene, indicating a redshift upon immobilization. (d-g) Spatial Raman intensity maps. (d)  $I_{2D}/I_G$  ratio and (e)  $I_D/I_G$  ratio of pristine graphene. (f)  $I_{2D}/I_G$  ratio and (g)  $I_D/I_G$  ratio after pDNA immobilization, confirming homogeneous functionalization with minimal induced defects.

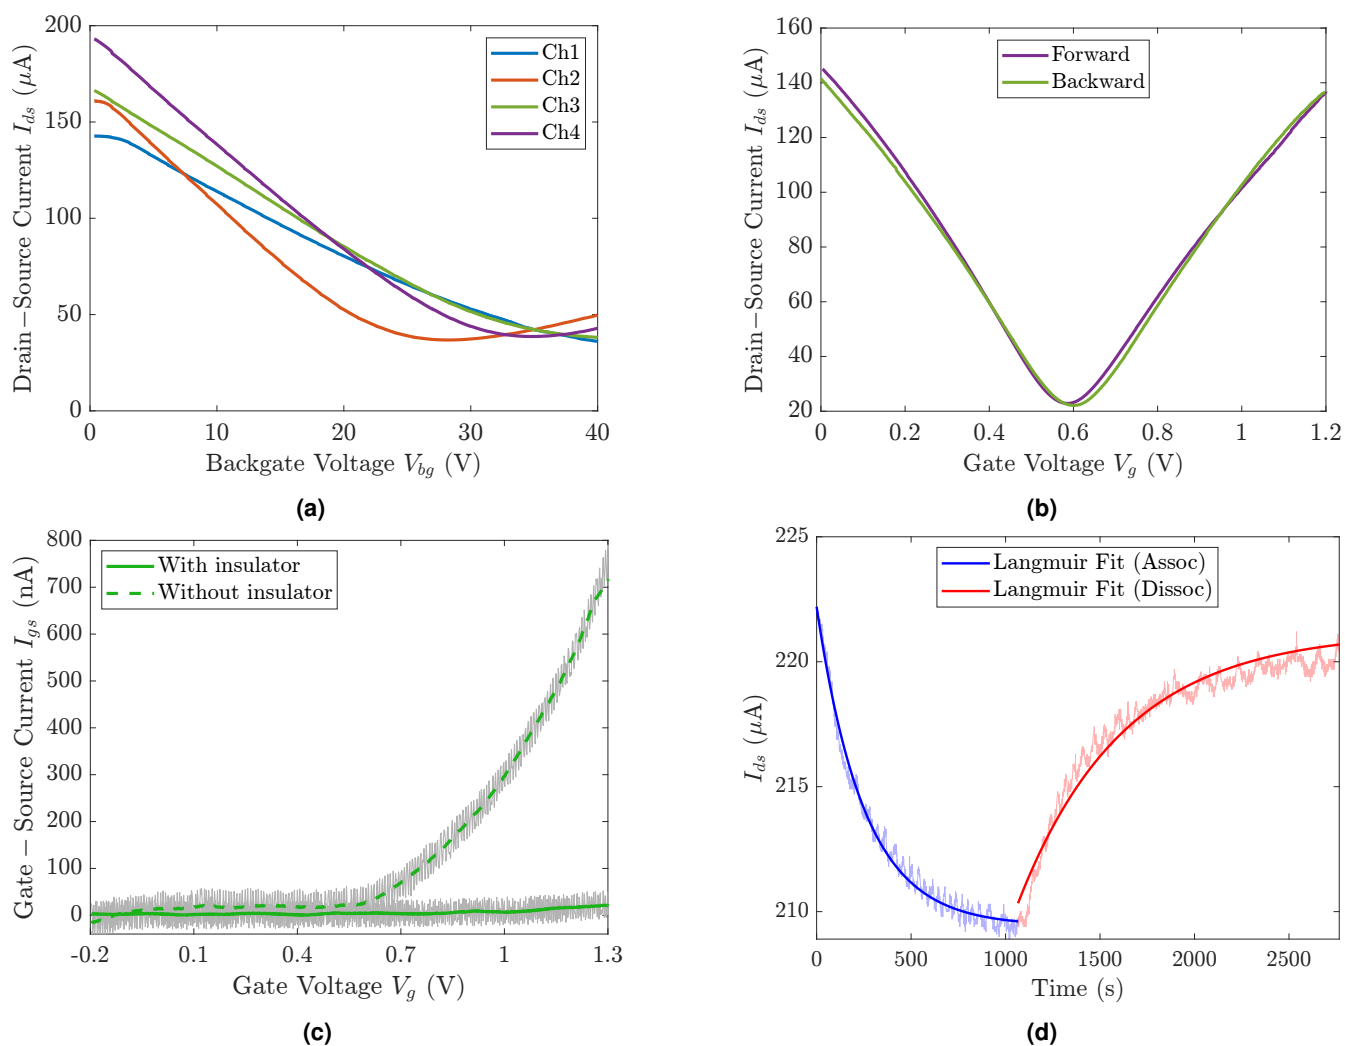

**Figure S3. Electrical characterization of the GFET-based MC receiver.** (a) Back-gate transfer characteristics ( $I_{ds}$  vs.  $V_{bg}$ ) of four representative GFET channels used for extracting carrier mobility. (b) Solution-gate transfer characteristics ( $I_{ds}$  vs.  $V_g$ ) showing negligible hysteresis. (c) Gate leakage current ( $I_{gs}$  vs.  $V_g$ ) comparison between devices with and without the  $\text{Al}_2\text{O}_3$  passivation layer. (d) Kinetic analysis of the association and dissociation phases, fitted to the Langmuir kinetic model (blue line for association, red line for dissociation).

### 3 Signal Detection Results Using Three Detection Methods

#### Scenario 1: Low Flow, Long Symbol Duration

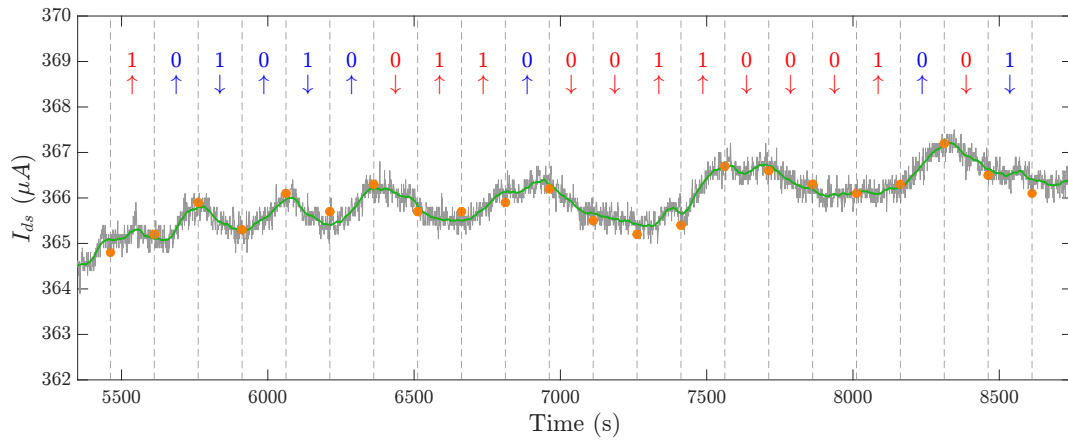

(a) Difference-based detection

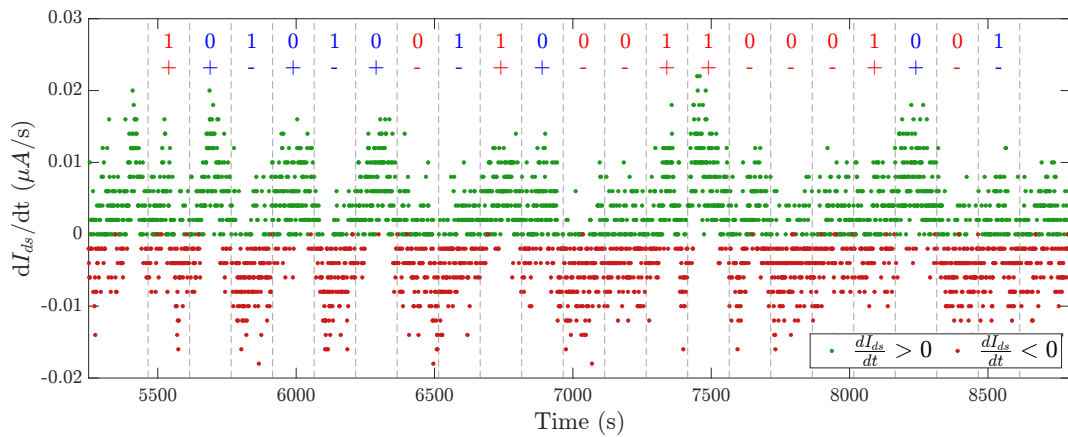

(b) Derivative-based detection

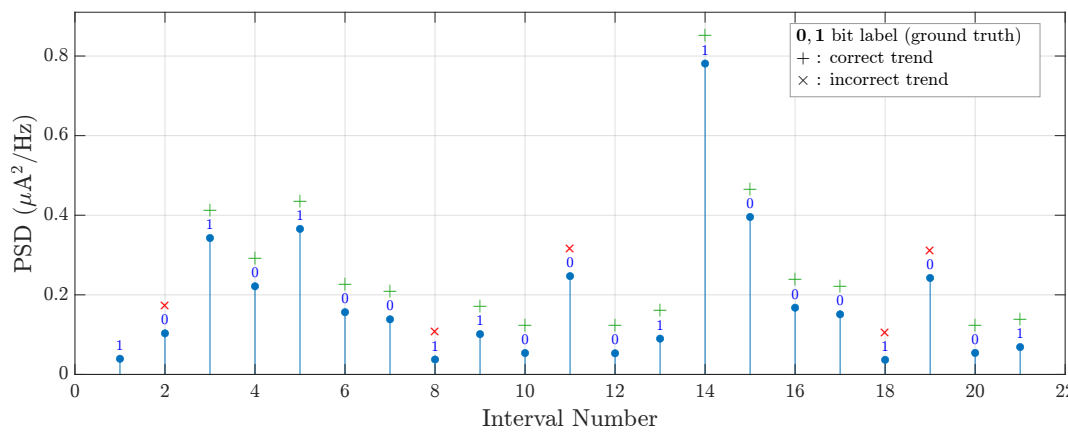

(c) Frequency-domain detection

**Figure S4. Signal detection results for Scenario 1: Low Flow Rate, Long Symbol Duration**

( $T_p = 60s$ ,  $T_s = 150s$ ,  $u = 40\mu L/min$ ). The low flow rate results in weak signal modulation and significant drift (low SNR), leading to high BERs across all methods.

**Scenario 2: High Flow rate, Short Symbol Duration**

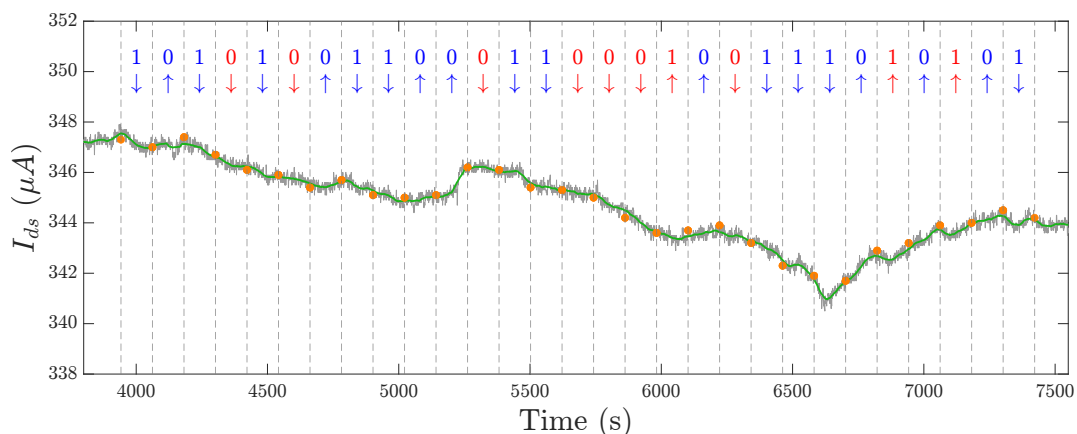

(a) Difference-based detection

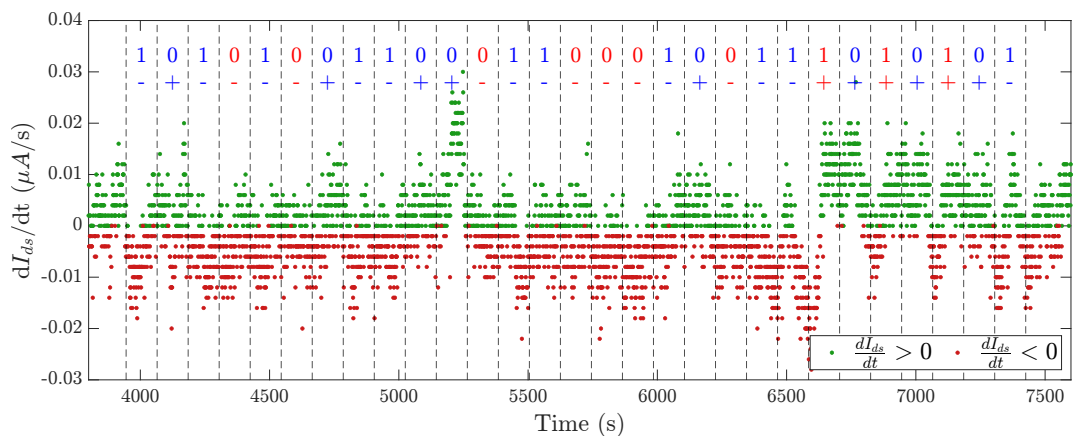

(b) Derivative-based detection

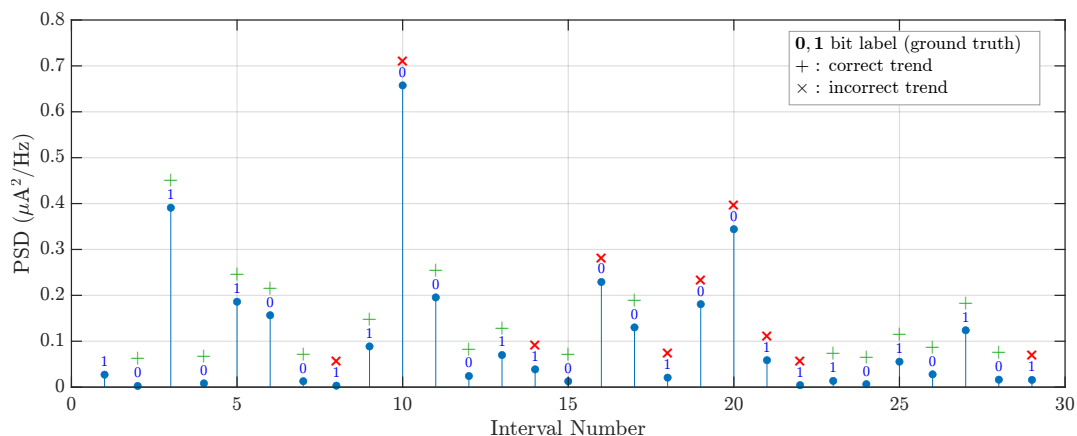

(c) Frequency-domain detection

**Figure S5. High Flow Rate, Short Symbol Duration ( $T_p = 30$  s,  $T_s = 120$  s,  $u = 80 \mu\text{L}/\text{min}$ )**

**Scenario 3: Moderate Pulse Width, Short Symbol Duration**

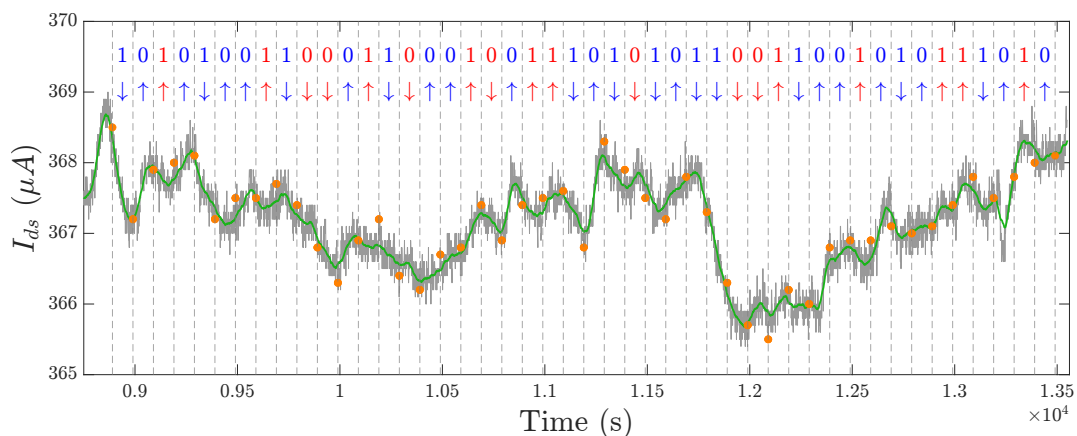

(a) Difference-based detection

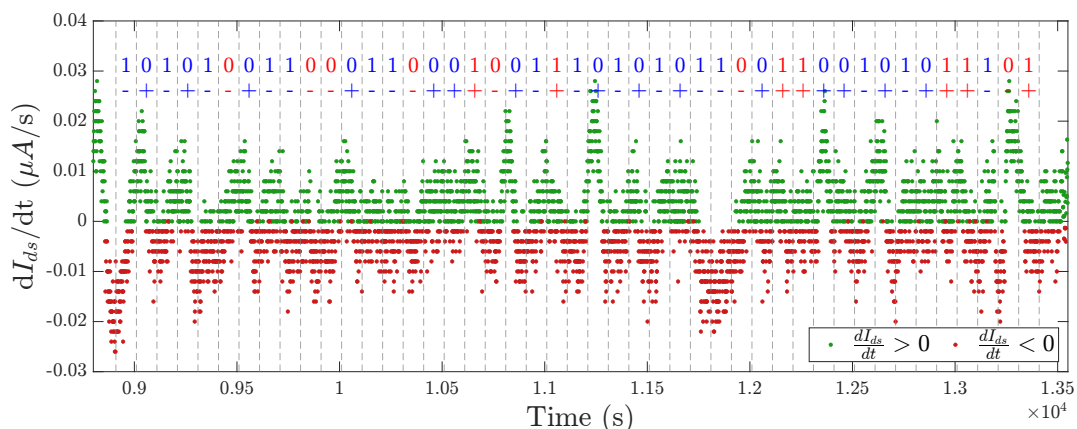

(b) Derivative-based detection

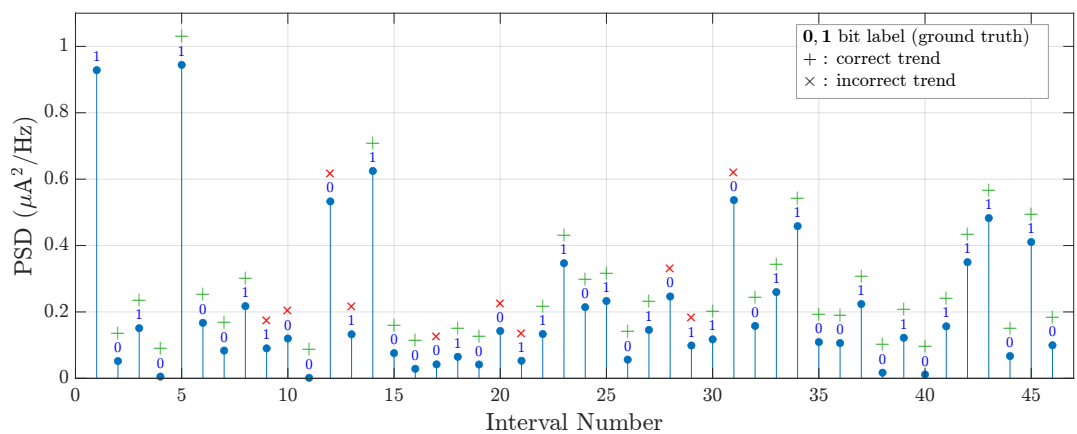

(c) Frequency-domain detection

**Figure S6. Moderate Pulse Width, Short Symbol Duration ( $T_p = 40\text{s}$ ,  $T_s = 100\text{s}$ ,  $u = 80\mu\text{L}/\text{min}$ ).**
